# Supplementary material
Source: PubMed Central journal article supplement (PMC6237234)
Supplement: jciinsight-3-121886-s196.pdf [file jciinsight-3-121886-s196.pdf]

## **Supplemental data**

### **Essential role of interferon-gamma in T cell-associated intestinal inflammation**

Yoshihiro Eriguchi<sup>1\*</sup>, Kiminori Nakamura<sup>2</sup>, Yuki Yokoi<sup>2</sup>, Rina Sugimoto<sup>2</sup>, Shuichiro Takahashi<sup>3</sup>, Daigo Hashimoto<sup>3</sup>, Takanori Teshima<sup>3</sup>, Tokiyoshi Ayabe<sup>2</sup>, Michael E. Selsted<sup>1</sup>, and André J. Ouellette<sup>1</sup>

<sup>1</sup> Department of Pathology and Laboratory Medicine, Norris Comprehensive Cancer Center, Keck School of Medicine, University of Southern California, Los Angeles, California, USA.

<sup>2</sup> Department of Cell Biological Science, Graduate School of Life Science, Faculty of Advanced Life Science, Hokkaido University, Sapporo, Japan.

<sup>3</sup> Department of Hematology, Hokkaido University Faculty of Medicine, Sapporo, Japan.

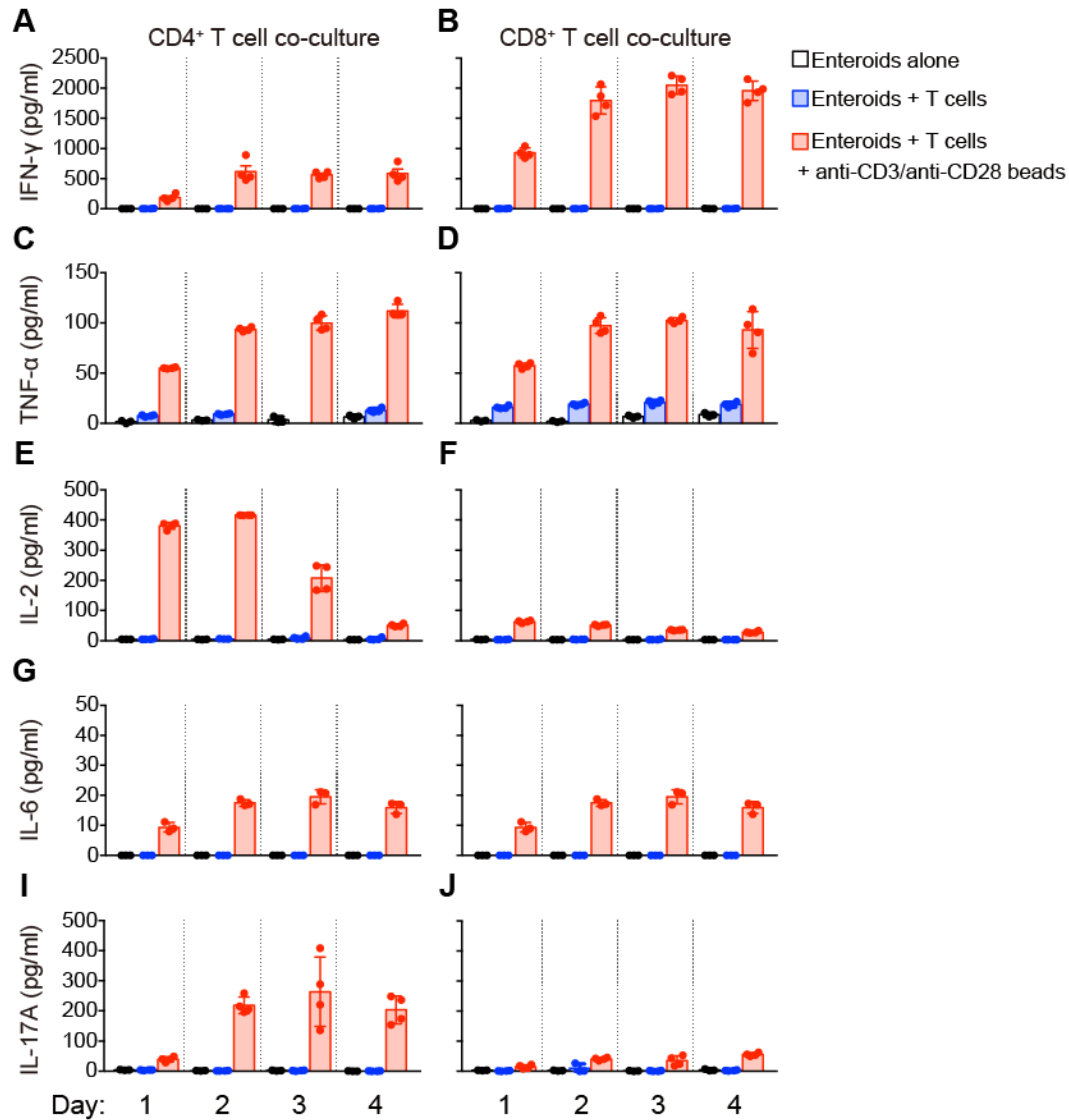

**Supplemental Figure 1. Cytokines in media of enteroid and T cell co-cultures.**

Conditioned media were collected daily from enteroids in co-culture with CD4<sup>+</sup> (A, C, E, G, I) or CD8<sup>+</sup> (B, D, F, H, J) T cells on days 1-4. Media levels of (A, B) TNF- $\alpha$ , (C, D) IFN- $\gamma$ , (E, F) IL-2, (G, H) IL-6, (I, J) IL-17A were measured by ELISA. Data are representative of 2 independent experiments and are shown as means  $\pm$  SD (enteroids alone, n = 3 independent wells, open bars; enteroids + non-activated T cells, n = 4, blue bars; enteroids + activated T cells, n = 4, red bars).

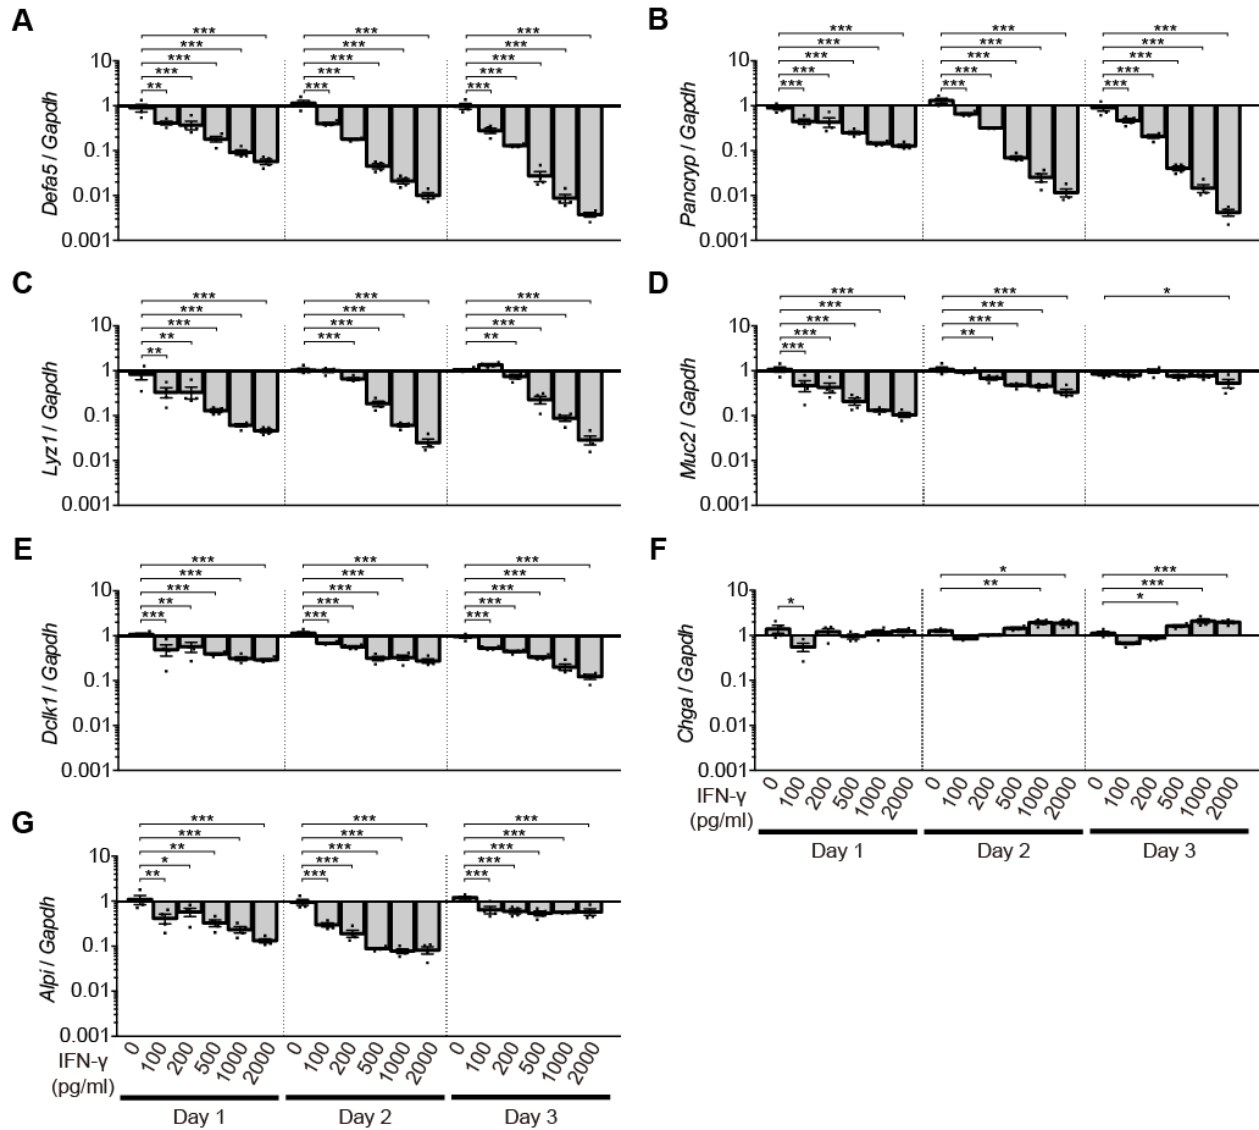

**Supplemental Figure 2. IFN- $\gamma$  induces Paneth cell loss and disrupts intestinal epithelial cell homeostasis.** Enteroids were exposed to several concentrations of IFN-gamma for 3 days. (A-G) qRT-PCR analyses to quantify lineage-specific marker mRNAs as shown in enteroids exposed to IFN- $\gamma$  for 1, 2, and 3 days as shown. PCR products amplified by universal mouse Defa primer pairs are shown as *Pancryp*. Data are from two independent experiments and shown as means  $\pm$  SEM (n = 4 independent wells). Dunnett's multiple comparisons test was used to compare each IFN- $\gamma$ -treated group with the control group at each time point. \* $P < 0.05$ , \*\* $P < 0.01$ , \*\*\* $P < 0.001$ .

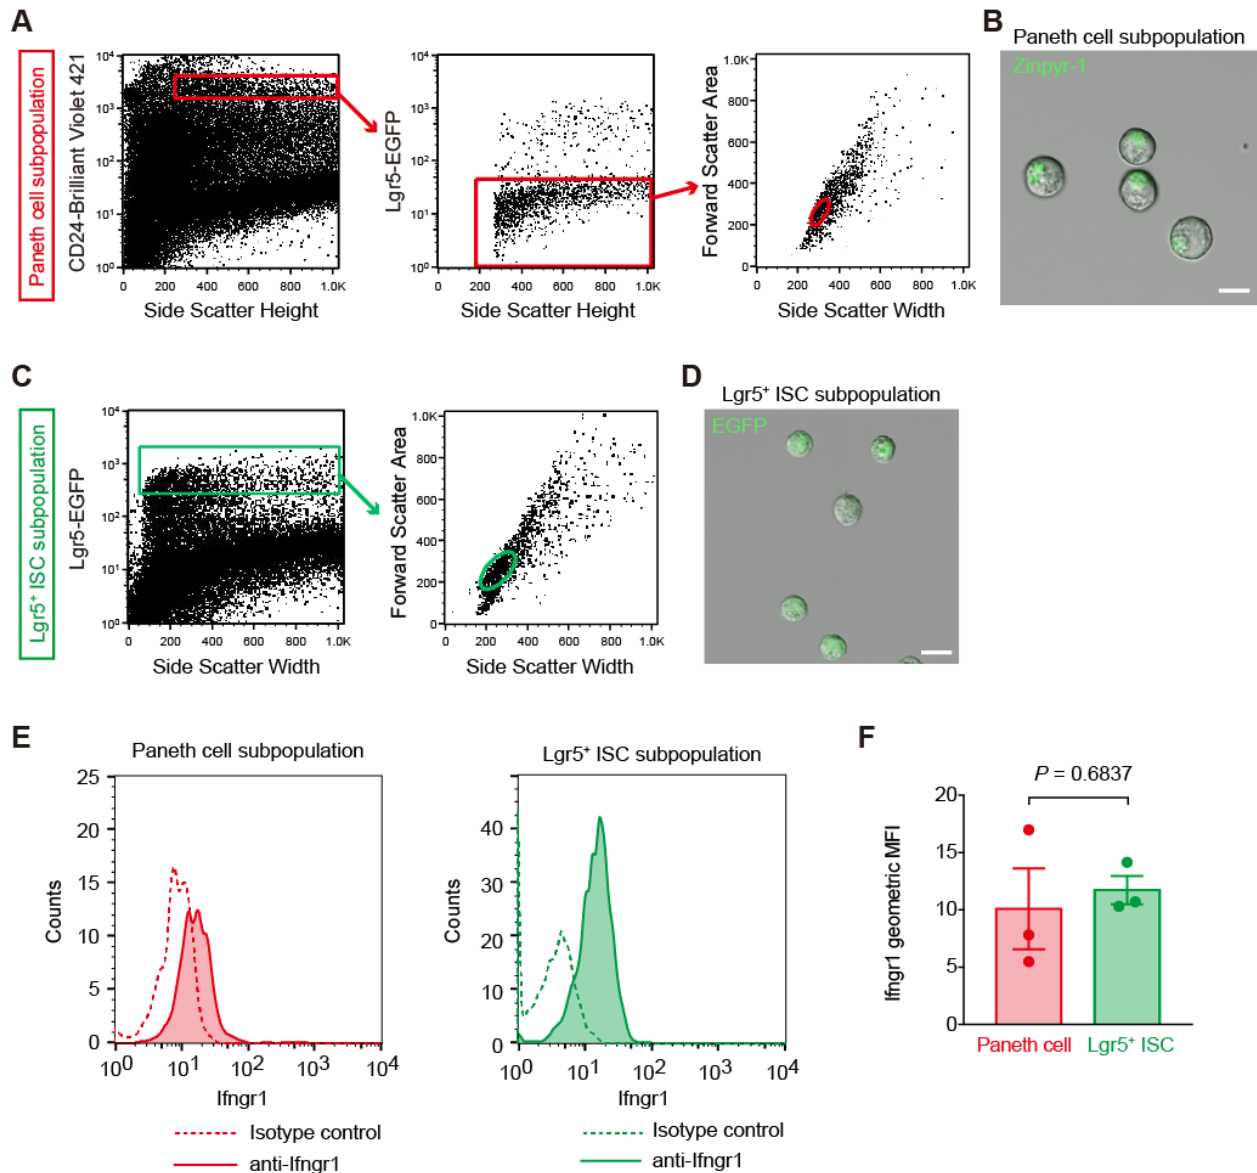

**Supplemental Figure 3. IFN- $\gamma$  receptor 1 expression on both Paneth cells and Lgr5<sup>+</sup> ISCs.** (A, C) FACS plots of dissociated single cells from *Lgr5-EGFP-ires-CreERT2* small intestine. (A) CD24<sup>hi</sup>Lgr5-EGFP<sup>lo</sup> fraction was defined as Paneth cell subpopulation. (B) Sorted Paneth cell subpopulation was stained with Zinpyr-1 (green) and identified as Paneth cells confirmed as Zinpyr-1<sup>+</sup> granular cells by confocal microscopy. Scale bar: 10  $\mu$ m. (C) Lgr5-EGFP<sup>hi</sup> fraction was defined as the Lgr5<sup>+</sup> ISC subpopulation. (D) Confocal microscopic image of the sorted Lgr5<sup>+</sup> ISC subpopulation. Scale bar: 10  $\mu$ m. (E) Paneth cell and Lgr5<sup>+</sup> ISC subpopulations were analyzed via flow cytometry for IFN- $\gamma$  receptor 1 (Ifngr1) expression. (F) Ifngr1 geometric Mean Fluorescence Intensity (MFI) of Paneth cell and Lgr5<sup>+</sup> ISCs subpopulations. Three independent experiments were combined and presented as means  $\pm$  SEM.  $P = 0.6837$  in two-tailed unpaired  $t$  test.

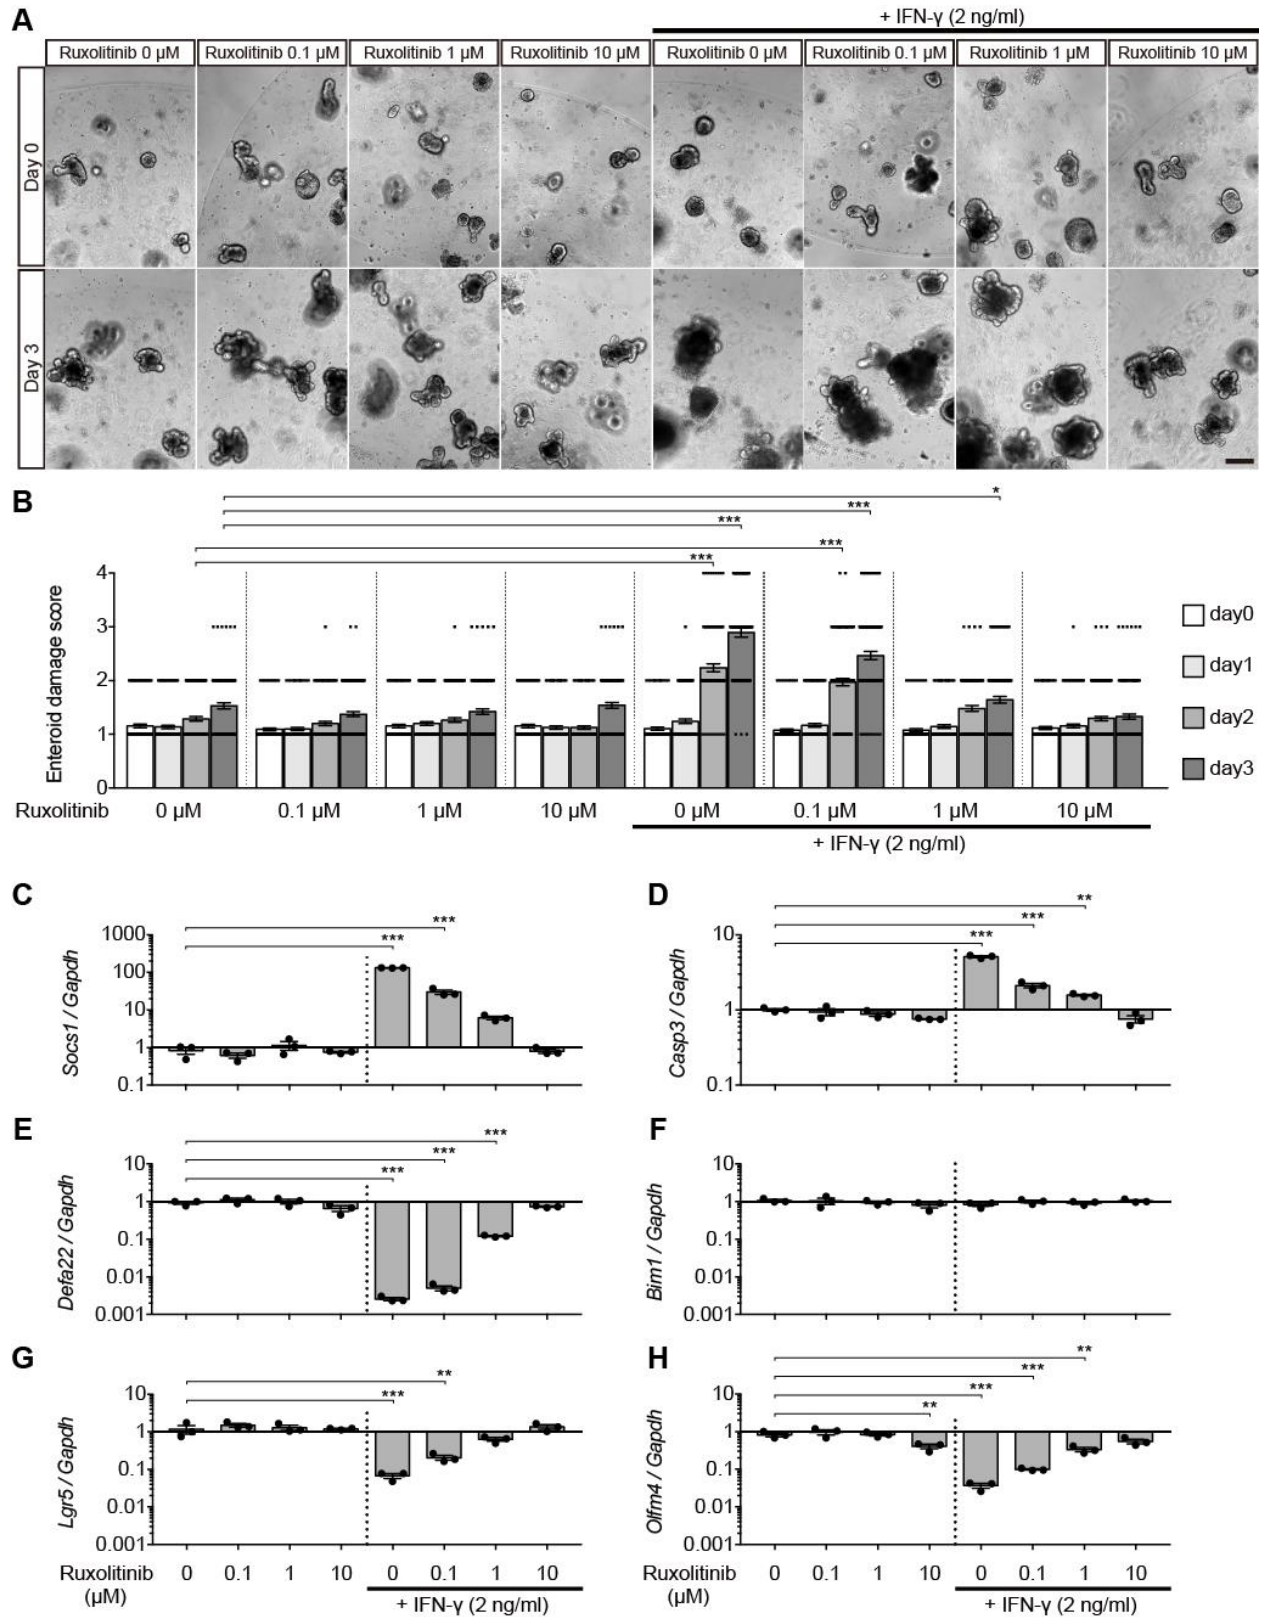

Supplemental Figure 4. Ruxolitinib prevents IFN- $\gamma$  induced enteroid damage. (A)

Enteroids exposed to 0 or 2 ng/ml IFN- $\gamma$  were treated with ruxolitinib as shown. **(B)** Damage scores of enteroids from panel **A**. Data are representative of two independent experiments shown as means  $\pm$  SEM, n = 100 enteroids per group. **(C, D, E, F, G, and H)** qRT-PCR analyses to quantify lineage-specific, apoptosis, and IFN- $\gamma$  target gene (*Socs1*) mRNAs in enteroids exposed to ruxolitinib and IFN- $\gamma$  for 3 days. Data are representative of two independent experiments shown as means  $\pm$  SEM, n = 3 independent wells. Dunnett's multiple comparisons test was used to compare each group with the untreated group at each same time point. \**P* < 0.05, \*\**P* < 0.01, \*\*\**P* < 0.001. Scale bar: 200  $\mu$ m.

### **Supplemental Video 1**

**IFN- $\gamma$  induces Paneth cell death through a caspase-3/7-dependent pathway.** To test whether IFN- $\gamma$  exposure induces caspase-3-dependent Paneth cell death in enteroids, we observed caspase-3/7 activity in enteroid crypt domains exposed to 2 ng/ml IFN- $\gamma$  for 10-16 hours. Paneth cells are granule-containing cells that appear white in the differential interference contrast time-lapse video. Cells containing activated caspase-3/7 have bright green nuclei, which were detected in Paneth cells and extruded into the crypt lumen. Scale bar: 20  $\mu$ m.

### **Supplemental Video 2**

**Enteroid Paneth cell response to IFN- $\gamma$  exposure.** Supplemental Video 1 shown in the absence of activated caspase-3/7 detection.

**Supplemental Table 1. Gene-specific primers for qRT-PCR**

|                                                | Gene           | forward primer (5'-3')     | reverse primer (5'-3')   |
|------------------------------------------------|----------------|----------------------------|--------------------------|
| internal control                               | <i>Gapdh</i>   | AACAGCAACTCCCCTCTTC        | CCTGTTGCTGTAGCCGTATT     |
| Paneth cell markers                            | <i>Defa22</i>  | CAGCATCAGTGGCCTCAGAG       | GGCTGTGCTTGTCTCCTTTGGAG  |
|                                                | <i>Defa5</i>   | AGCAGACCCTTCTTGGCCTC       | GCTCAACAATTCTCCAGGTGACCC |
|                                                | <i>Pancryp</i> | GGTGATCATCAGACCCCAGCATCAGT | AAGAGACTAAACTGAGGAGCAGC  |
|                                                | <i>Lyz1</i>    | GTGCCTGTCCTGATCTTTCT       | GATTTGCTCCTGTGGTTATTGG   |
| rapid cycling ISC markers                      | <i>Lgr5</i>    | CGTAGGCAACCCTTCTCTTATC     | GCACCATTCAAAGTCAGTGTTTC  |
|                                                | <i>Olfm4</i>   | AGTACACAGCTCACATCCTTTC     | TCAGGAGCCTCTTCTCATACA    |
| quiescent ISC marker                           | <i>Bmi1</i>    | GGAACCCTGTAGTGGATTGTAAG    | CATTGGGCTTTTCGAGCAATATAC |
| goblet cell marker                             | <i>Muc2</i>    | CTACCACCATTACCACCACTAC     | GTCTCTCGATCACCACCATTT    |
| tuft cell marker                               | <i>Dclk1</i>   | CTGGTAACGGAACCTTCTCTGG     | GTACTACTCTGGATGGGAAGCA   |
| enteroendocrine cell marker                    | <i>Chga</i>    | CAGGGACACTATGGAGAAGAGA     | CTCTTGGTTAGGCTCTGGAAAG   |
| enterocyte marker                              | <i>Alpi</i>    | GGTCAAGGCCAACTACAAGA       | CACGGTACATCACTGAGAAGAC   |
| Wnt ligand of Paneth cell origin               | <i>Wnt3</i>    | GTCCCACTTCTTTGTGTTAGA      | TGGGAAGAAGGGCTTGTTAAG    |
| Notch ligand of Paneth cell origin             | <i>Dll4</i>    | GGGAACAGAGTTGAGGAGTTAG     | CACTCTCTGGAGAACAGTCAAG   |
| Notch ligand of secretory progenitor origin    | <i>Dll1</i>    | GGAGGACGATGTTTACAGATAACC   | CGCAGAGATCCATCTTCTTCTC   |
| Notch receptors                                | <i>Notch1</i>  | GCAACTGTCCTCTGCCATATAC     | GTCTTCAGACTCCTTGCATACC   |
|                                                | <i>Nothc2</i>  | AGACTGGCGACTTCACTTTC       | TCCACACAAACTCCTCCATTC    |
| required for intestinal secretory lineages     | <i>Atoh1</i>   | GGTCTGTGGTGATCGTTGTTA      | TACAGAGGAAGGAGAAGGTAGG   |
| required for Paneth and goblet cell progenitor | <i>Gfi1</i>    | GTAAGGAACTGTGCTAGGTATGG    | CACAGGCTCTAGCTATGTTGAA   |
| required for Paneth cells and ISCs             | <i>Sox9</i>    | CCTGGACTGTATGTGGATGTG      | TAAGGTCTGTCCGATGTCTCT    |
| negative regulator secretory lineages          | <i>Hes1</i>    | CTATCATGGAGAAGAGGCGAAG     | CCGGGAGCTATCTTTCTTAAGTG  |
| apoptosis marker                               | <i>Casp3</i>   | AGTGGGACTGATGAGGAGAT       | GTAACCAGGTGCTGTAGAGTAAG  |
| IFN- $\gamma$ target gene                      | <i>Socs1</i>   | TGTAGCAGCTTGTGTCTGG        | CCTGGTTTGTGCAAAGATACTG   |



**Supplemental Table 2. Mean values of Figure 9C-G data**

| Cohorts                                      | Control | IFN- $\gamma$ alone | IFN- $\gamma$ + ruxolitinib | TBI alone | TBI + IFN- $\gamma$ | TBI + IFN- $\gamma$ + ruxolitinib |
|----------------------------------------------|---------|---------------------|-----------------------------|-----------|---------------------|-----------------------------------|
| Small intestinal length (cm)                 | 25.9    | 19.1                | 23.9                        | 24.9      | 17.4                | 22.2                              |
| No. of whole crypts / circumference          | 100.0   | 83.0                | 102.0                       | 98.5      | 64.5                | 88.0                              |
| No. of cryptdin-1 (+) crypts / circumference | 95.0    | 56.2                | 88.3                        | 94.5      | 14.0                | 59.0                              |
| No. of Lgr5-GFP (+) crypts / circumference   | 80.0    | 39.4                | 75.4                        | 46.1      | 1.4                 | 24.3                              |
| No. of Olm4 (+) crypts / circumference       | 95.5    | 38.0                | 91.0                        | 85.0      | 6.5                 | 66.2                              |

**Supplemental Table 3. Adjusted *P* values and comparisons test summary of Figure 9C-G**

| Tukey's multiple comparisons test (Adjusted <i>P</i> value)       | small intestinal length | whole crypts counts | cryptdin-1 (+) crypt counts | Lgr5-GFP (+) crypt counts | Olfm4 (+) crypt counts |
|-------------------------------------------------------------------|-------------------------|---------------------|-----------------------------|---------------------------|------------------------|
| Control vs. IFN- $\gamma$ alone                                   | <0.0001                 | 0.1334              | 0.0006                      | <0.0001                   | <0.0001                |
| Control vs. IFN- $\gamma$ + ruxolitinib                           | 0.1837                  | 0.9996              | 0.9614                      | 0.9969                    | 0.9893                 |
| Control vs. TBI alone                                             | 0.7937                  | 0.9998              | >0.9999                     | 0.0001                    | 0.8631                 |
| Control vs. TBI + IFN- $\gamma$                                   | <0.0001                 | 0.0001              | <0.0001                     | <0.0001                   | <0.0001                |
| Control vs. TBI + IFN- $\gamma$ + ruxolitinib                     | 0.0011                  | 0.4677              | 0.0015                      | <0.0001                   | 0.0048                 |
| IFN- $\gamma$ alone vs. IFN- $\gamma$ + ruxolitinib               | <0.0001                 | 0.0709              | 0.0052                      | <0.0001                   | <0.0001                |
| IFN- $\gamma$ alone vs. TBI alone                                 | <0.0001                 | 0.2146              | 0.0006                      | 0.9183                    | <0.0001                |
| IFN- $\gamma$ alone vs. TBI + IFN- $\gamma$                       | 0.298                   | 0.0835              | 0.0002                      | 0.0001                    | 0.0022                 |
| IFN- $\gamma$ alone vs. TBI + IFN- $\gamma$ + ruxolitinib         | 0.0049                  | 0.9723              | 0.9992                      | 0.1436                    | 0.0072                 |
| IFN- $\gamma$ + ruxolitinib vs. TBI alone                         | 0.8381                  | 0.9931              | 0.969                       | 0.0004                    | 0.9949                 |
| IFN- $\gamma$ + ruxolitinib vs. TBI + IFN- $\gamma$               | <0.0001                 | <0.0001             | <0.0001                     | <0.0001                   | <0.0001                |
| IFN- $\gamma$ + ruxolitinib vs. TBI + IFN- $\gamma$ + ruxolitinib | 0.2901                  | 0.3019              | 0.0128                      | <0.0001                   | 0.0225                 |
| TBI alone vs. TBI + IFN- $\gamma$                                 | <0.0001                 | 0.0002              | <0.0001                     | <0.0001                   | <0.0001                |
| TBI alone vs. TBI + IFN- $\gamma$ + ruxolitinib                   | 0.0223                  | 0.6244              | 0.0017                      | 0.0156                    | 0.075                  |
| TBI + IFN- $\gamma$ vs. TBI + IFN- $\gamma$ + ruxolitinib         | <0.0001                 | 0.0142              | <0.0001                     | 0.0915                    | <0.0001                |

| Tukey's multiple comparisons test (summary)                       | small intestinal length | whole crypts counts | cryptdin-1 (+) crypt counts | Lgr5-GFP (+) crypt counts | Olfm4 (+) crypt counts |
|-------------------------------------------------------------------|-------------------------|---------------------|-----------------------------|---------------------------|------------------------|
| Control vs. IFN- $\gamma$ alone                                   | ****                    | ns                  | ***                         | ****                      | ****                   |
| Control vs. IFN- $\gamma$ + ruxolitinib                           | ns                      | ns                  | ns                          | ns                        | ns                     |
| Control vs. TBI alone                                             | ns                      | ns                  | ns                          | ***                       | ns                     |
| Control vs. TBI + IFN- $\gamma$                                   | ****                    | ***                 | ****                        | ****                      | ****                   |
| Control vs. TBI + IFN- $\gamma$ + ruxolitinib                     | **                      | ns                  | **                          | ****                      | **                     |
| IFN- $\gamma$ alone vs. IFN- $\gamma$ + ruxolitinib               | ****                    | ns                  | **                          | ****                      | ****                   |
| IFN- $\gamma$ alone vs. TBI alone                                 | ****                    | ns                  | ***                         | ns                        | ****                   |
| IFN- $\gamma$ alone vs. TBI + IFN- $\gamma$                       | ns                      | ns                  | ***                         | ***                       | **                     |
| IFN- $\gamma$ alone vs. TBI + IFN- $\gamma$ + ruxolitinib         | **                      | ns                  | ns                          | ns                        | **                     |
| IFN- $\gamma$ + ruxolitinib vs. TBI alone                         | ns                      | ns                  | ns                          | ***                       | ns                     |
| IFN- $\gamma$ + ruxolitinib vs. TBI + IFN- $\gamma$               | ****                    | ****                | ****                        | ****                      | ****                   |
| IFN- $\gamma$ + ruxolitinib vs. TBI + IFN- $\gamma$ + ruxolitinib | ns                      | ns                  | *                           | ****                      | *                      |
| TBI alone vs. TBI + IFN- $\gamma$                                 | ****                    | ***                 | ****                        | ****                      | ****                   |
| TBI alone vs. TBI + IFN- $\gamma$ + ruxolitinib                   | *                       | ns                  | **                          | *                         | ns                     |
| TBI + IFN- $\gamma$ vs. TBI + IFN- $\gamma$ + ruxolitinib         | ****                    | *                   | ****                        | ns                        | ****                   |

Tukey's multiple comparisons test was used to compare the each group of **Figure 9C-G** data. Upper table shows adjusted *P* values. Lower table shows the summary of comparisons test. \**P* < 0.05, \*\**P* < 0.01, \*\*\**P* < 0.001, \*\*\*\**P* < 0.0001.

**Supplemental Table 4. Adjusted *P* values and comparisons test summary of Figure 9H,I**

| Adjusted <i>P</i> Value                                           | <i>Defa22</i> | <i>Lgr5</i> | <i>Olfm4</i> | <i>Bmi1</i> | <i>Muc2</i> | <i>Dclk1</i> | <i>Chga</i> | <i>Alpi</i> | <i>Wnt3</i> | <i>Dll4</i> | <i>Dll1</i> | <i>Notch1</i> | <i>Notch2</i> | <i>Hes1</i> | <i>Atoh1</i> | <i>Gfi1</i> | <i>Sox9</i> |
|-------------------------------------------------------------------|---------------|-------------|--------------|-------------|-------------|--------------|-------------|-------------|-------------|-------------|-------------|---------------|---------------|-------------|--------------|-------------|-------------|
| Control vs. IFN- $\gamma$ alone                                   | 0.0005        | <0.0001     | <0.0001      | 0.0034      | <0.0001     | <0.0001      | 0.8948      | <0.0001     | 0.0156      | 0.2732      | <0.0001     | 0.7018        | 0.92          | 0.0234      | <0.0001      | 0.0002      | 0.0132      |
| Control vs. IFN- $\gamma$ + ruxolitinib                           | 0.8632        | 0.0621      | 0.8871       | 0.0083      | 0.0004      | 0.0002       | 0.0808      | 0.0042      | 0.7707      | 0.0234      | 0.8306      | >0.9999       | 0.7707        | 0.9973      | 0.9831       | 0.9371      | 0.9707      |
| Control vs. TBI alone                                             | 0.0239        | 0.2837      | 0.0635       | 0.9998      | 0.0664      | 0.9976       | 0.9938      | 0.1035      | 0.7463      | 0.8427      | 0.9754      | 0.9784        | 0.2536        | 0.3335      | 0.9423       | 0.9993      | 0.1229      |
| Control vs. TBI + IFN- $\gamma$                                   | 0.0005        | <0.0001     | <0.0001      | 0.0003      | <0.0001     | <0.0001      | 0.0172      | <0.0001     | 0.0714      | 0.0002      | <0.0001     | 0.0018        | <0.0001       | 0.45        | <0.0001      | <0.0001     | 0.0323      |
| Control vs. TBI + IFN- $\gamma$ + ruxolitinib                     | 0.0038        | 0.0049      | 0.0008       | 0.0103      | <0.0001     | <0.0001      | 0.1677      | <0.0001     | 0.804       | 0.0069      | 0.0201      | 0.755         | 0.9897        | 0.9772      | 0.0001       | 0.1719      | 0.9923      |
| IFN- $\gamma$ alone vs. IFN- $\gamma$ + ruxolitinib               | 0.0113        | 0.1555      | <0.0001      | 0.9993      | 0.0094      | 0.0437       | 0.5026      | 0.0011      | 0.0004      | 0.8469      | 0.0002      | 0.8271        | 0.2225        | 0.0074      | <0.0001      | <0.0001     | 0.081       |
| IFN- $\gamma$ alone vs. TBI alone                                 | <0.0001       | 0.0284      | 0.0046       | 0.0016      | <0.0001     | <0.0001      | 0.9954      | <0.0001     | 0.0004      | 0.0229      | <0.0001     | 0.285         | 0.0331        | <0.0001     | <0.0001      | <0.0001     | <0.0001     |
| IFN- $\gamma$ alone vs. TBI + IFN- $\gamma$                       | >0.9999       | 0.7002      | 0.9998       | 0.9575      | 0.7235      | 0.9299       | 0.001       | >0.9999     | 0.9867      | 0.0703      | 0.9758      | <0.0001       | <0.0001       | 0.6631      | 0.1962       | 0.7236      | 0.9991      |
| IFN- $\gamma$ alone vs. TBI + IFN- $\gamma$ + ruxolitinib         | 0.944         | 0.5578      | 0.1365       | 0.9915      | 0.9742      | 0.9485       | 0.7475      | 0.6734      | 0.1901      | 0.6239      | 0.0452      | >0.9999       | 0.5876        | 0.0921      | 0.0665       | 0.0718      | 0.002       |
| IFN- $\gamma$ + ruxolitinib vs. TBI alone                         | 0.0012        | 0.9694      | 0.4486       | 0.0041      | 0.367       | <0.0001      | 0.2346      | 0.7684      | >0.9999     | 0.001       | 0.3957      | 0.9311        | 0.9417        | 0.6007      | >0.9999      | 0.9914      | 0.0217      |
| IFN- $\gamma$ + ruxolitinib vs. TBI + IFN- $\gamma$               | 0.0113        | 0.0052      | <0.0001      | 0.8426      | 0.0002      | 0.2926       | <0.0001     | 0.0006      | 0.0026      | 0.5346      | <0.0001     | 0.001         | <0.0001       | 0.2227      | <0.0001      | <0.0001     | 0.1698      |
| IFN- $\gamma$ + ruxolitinib vs. TBI + IFN- $\gamma$ + ruxolitinib | 0.07          | 0.9387      | 0.0164       | >0.9999     | 0.0418      | 0.2127       | 0.997       | 0.0329      | 0.1196      | 0.9992      | 0.2818      | 0.8723        | 0.9714        | 0.8349      | 0.0008       | 0.0207      | 0.7447      |
| TBI alone vs. TBI + IFN- $\gamma$                                 | <0.0001       | 0.0006      | 0.0023       | 0.0002      | <0.0001     | <0.0001      | 0.0042      | <0.0001     | 0.0023      | <0.0001     | <0.0001     | 0.012         | <0.0001       | 0.0057      | <0.0001      | <0.0001     | <0.0001     |
| TBI alone vs. TBI + IFN- $\gamma$ + ruxolitinib                   | <0.0001       | 0.5265      | 0.6192       | 0.005       | 0.0002      | <0.0001      | 0.4244      | 0.0009      | 0.109       | 0.0002      | 0.0027      | 0.3161        | 0.5381        | 0.0733      | 0.0015       | 0.0843      | 0.291       |
| TBI + IFN- $\gamma$ vs. TBI + IFN- $\gamma$ + ruxolitinib         | 0.9436        | 0.0362      | 0.0782       | 0.6949      | 0.2643      | >0.9999      | <0.0001     | 0.5548      | 0.5263      | 0.7133      | 0.0068      | <0.0001       | <0.0001       | 0.836       | 0.0001       | 0.0018      | 0.0056      |

| Tukey's multiple comparisons test (summary)                       | <i>Defa22</i> | <i>Lgr5</i> | <i>Olfm4</i> | <i>Bmi1</i> | <i>Muc2</i> | <i>Dclk1</i> | <i>Chga</i> | <i>Alpi</i> | <i>Wnt3</i> | <i>Dll4</i> | <i>Dll1</i> | <i>Notch1</i> | <i>Notch2</i> | <i>Hes1</i> | <i>Atoh1</i> | <i>Gfi1</i> | <i>Sox9</i> |
|-------------------------------------------------------------------|---------------|-------------|--------------|-------------|-------------|--------------|-------------|-------------|-------------|-------------|-------------|---------------|---------------|-------------|--------------|-------------|-------------|
| Control vs. IFN- $\gamma$ alone                                   | ***           | ****        | ****         | **          | ****        | ****         | ns          | ****        | *           | ns          | ****        | ns            | ns            | *           | ****         | ***         | *           |
| Control vs. IFN- $\gamma$ + ruxolitinib                           | ns            | ns          | ns           | **          | ***         | ***          | ns          | **          | ns          | *           | ns          | ns            | ns            | ns          | ns           | ns          | ns          |
| Control vs. TBI alone                                             | *             | ns          | ns           | ns          | ns          | ns           | ns          | ns          | ns          | ns          | ns          | ns            | ns            | ns          | ns           | ns          | ns          |
| Control vs. TBI + IFN- $\gamma$                                   | ***           | ****        | ****         | ***         | ****        | ****         | *           | ****        | ns          | ***         | ****        | **            | ****          | ns          | ****         | ****        | *           |
| Control vs. TBI + IFN- $\gamma$ + ruxolitinib                     | **            | **          | ***          | *           | ****        | ****         | ns          | ****        | ns          | **          | *           | ns            | ns            | ns          | ***          | ns          | ns          |
| IFN- $\gamma$ alone vs. IFN- $\gamma$ + ruxolitinib               | *             | ns          | ****         | ns          | **          | *            | ns          | **          | ***         | ns          | ***         | ns            | ns            | **          | ****         | ****        | ns          |
| IFN- $\gamma$ alone vs. TBI alone                                 | ****          | *           | **           | **          | ****        | ****         | ns          | ****        | ***         | *           | ****        | ns            | *             | ****        | ****         | ****        | ****        |
| IFN- $\gamma$ alone vs. TBI + IFN- $\gamma$                       | ns            | ns          | ns           | ns          | ns          | ns           | **          | ns          | ns          | ns          | ns          | ****          | ****          | ns          | ns           | ns          | ns          |
| IFN- $\gamma$ alone vs. TBI + IFN- $\gamma$ + ruxolitinib         | ns            | ns          | ns           | ns          | ns          | ns           | ns          | ns          | ns          | ns          | *           | ns            | ns            | ns          | ns           | ns          | **          |
| IFN- $\gamma$ + ruxolitinib vs. TBI alone                         | **            | ns          | ns           | **          | ns          | ****         | ns          | ns          | ns          | **          | ns          | ns            | ns            | ns          | ns           | ns          | *           |
| IFN- $\gamma$ + ruxolitinib vs. TBI + IFN- $\gamma$               | *             | **          | ****         | ns          | ***         | ns           | ****        | ***         | **          | ns          | ****        | ***           | ****          | ns          | ****         | ****        | ns          |
| IFN- $\gamma$ + ruxolitinib vs. TBI + IFN- $\gamma$ + ruxolitinib | ns            | ns          | *            | ns          | *           | ns           | ns          | *           | ns          | ns          | ns          | ns            | ns            | ns          | ***          | *           | ns          |
| TBI alone vs. TBI + IFN- $\gamma$                                 | ****          | ***         | **           | ***         | ****        | ****         | **          | ****        | **          | ****        | ****        | *             | ****          | **          | ****         | ****        | ****        |
| TBI alone vs. TBI + IFN- $\gamma$ + ruxolitinib                   | ****          | ns          | ns           | **          | ***         | ****         | ns          | ***         | ns          | ***         | **          | ns            | ns            | ns          | **           | ns          | ns          |
| TBI + IFN- $\gamma$ vs. TBI + IFN- $\gamma$ + ruxolitinib         | ns            | *           | ns           | ns          | ns          | ns           | ****        | ns          | ns          | ns          | **          | ****          | ****          | ns          | ***          | **          | **          |

Tukey's multiple comparisons test was used to compare the each group of **Figure 9H,I** data. Upper table shows adjusted *P* values. Lower table shows the summary of comparisons test. \**P* < 0.05, \*\**P* < 0.01, \*\*\**P* < 0.001, \*\*\*\**P* < 0.0001.

**Supplemental Table 5. Adjusted *P* values and comparisons test summary of Figure 10C**

| Tukey's multiple comparisons test                                 | Adjusted <i>P</i> Value |
|-------------------------------------------------------------------|-------------------------|
| Control vs. IFN- $\gamma$ alone                                   | <0.0001                 |
| Control vs. IFN- $\gamma$ + ruxolitinib                           | <0.0001                 |
| Control vs. TBI alone                                             | 0.0548                  |
| Control vs. TBI + IFN- $\gamma$                                   | <0.0001                 |
| Control vs. TBI + IFN- $\gamma$ + ruxolitinib                     | <0.0001                 |
| IFN- $\gamma$ alone vs. IFN- $\gamma$ + ruxolitinib               | <0.0001                 |
| IFN- $\gamma$ alone vs. TBI alone                                 | <0.0001                 |
| IFN- $\gamma$ alone vs. TBI + IFN- $\gamma$                       | <0.0001                 |
| IFN- $\gamma$ alone vs. TBI + IFN- $\gamma$ + ruxolitinib         | <0.0001                 |
| IFN- $\gamma$ + ruxolitinib vs. TBI alone                         | <0.0001                 |
| IFN- $\gamma$ + ruxolitinib vs. TBI + IFN- $\gamma$               | <0.0001                 |
| IFN- $\gamma$ + ruxolitinib vs. TBI + IFN- $\gamma$ + ruxolitinib | <0.0001                 |
| TBI alone vs. TBI + IFN- $\gamma$                                 | <0.0001                 |
| TBI alone vs. TBI + IFN- $\gamma$ + ruxolitinib                   | <0.0001                 |
| TBI + IFN- $\gamma$ vs. TBI + IFN- $\gamma$ + ruxolitinib         | <0.0001                 |

Tukey's multiple comparisons test was used to compare the each group of **Figure 10C** data.
